1 **Association between sexual and reproductive health knowledge and protective sexual**  
2 **behaviors among young women in Nigeria**

3 David Aduragbemi Okunola<sup>1,2</sup>, Oluwatobi Abel Alawode<sup>3</sup>, Anthony Idowu Ajayi<sup>4</sup>

4 <sup>1</sup>Viable Knowledge Masters, Abuja, Nigeria

5 <sup>2</sup>Viable Helpers Development Organization, Abuja, Nigeria

6 <sup>3</sup>Department of Sociology and Criminology & Law, University of Florida, Gainesville FL 32611,  
7 USA. Email: alawodeoluwatobi@ufl.edu

8 <sup>4</sup>Population Dynamics and Sexual and Reproductive Health and Rights Unit, African Population  
9 and Health Research Center, APHRC Campus, Manga Close, Nairobi, Kenya. Email:  
10 ajayianthony@gmail.com

11

12 **Corresponding author**

13 **Anthony Idowu Ajayi**

14 Population Dynamics and Sexual and Reproductive Health and Rights Unit,

15 African Population and Health Research Center,

16 APHRC Campus,

17 Manga Close,

18 Nairobi, Kenya.

19 Email: ajayianthony@gmail.com

20

21

22 **Abstract**

23 **Background:** While the literature is replete with studies on young people’s risky sexual behaviors  
24 and their effects on HIV and STI acquisition, unintended pregnancy, and unsafe abortion, few  
25 studies have explored the practice of protective sexual behaviors and its association with sexual  
26 and reproductive health knowledge. We examined the association between sexual and reproductive  
27 health knowledge and protective sexual behaviors using data of young women in Nigeria.

28 **Methods:** Data of 8,995 young women (aged 15-24) who were neither married nor living with a  
29 partner were obtained from the 2018 Nigeria Demographic and Health Survey (NDHS) and  
30 analyzed in this study. Protective sexual behaviors were measured using questions exploring  
31 sexual fidelity, condom use, having multiple partners, and abstinence, while sexual and  
32 reproductive health knowledge was measured with questions on fertility, fecundity,  
33 contraceptives, and HIV prevention. We fitted multinomial logistic regression to examine the  
34 association between sexual and reproductive health knowledge and protective sexual behaviors.

35 **Results:** The median score on sexual and reproductive health knowledge was five. The majority  
36 of the sample (71.5%) had no sexual experience, 6.6% abstained from sex in the past year, 7.2%  
37 used condoms and practiced sexual fidelity, 1.0% used condoms but did not practice sexual  
38 fidelity, 12.7% did not practice sexual fidelity but used condoms while 0.8% neither used condom  
39 nor practiced sexual fidelity. After controlling for important covariates, sexual and reproductive  
40 health knowledge was positively associated with “condom use and sexual fidelity” (uRRR = 1.28;  
41 CI = 1.04-1.60) relative to “not using condoms nor practicing sexual fidelity.” However, the  
42 association between sexual and reproductive health knowledge and other categories of protective  
43 sexual behaviors, such as no sexual experience, abstinence in the past year, and sexual fidelity but  
44 no condom use, did not reach a significant level.

45 **Conclusion:** We found a high prevalence of protective sexual behavior among young women in  
46 Nigeria. Our study provides evidence in support of the association between sexual and  
47 reproductive health knowledge and a higher likelihood of practicing protective sexual behaviors.  
48 Intervention efforts can focus on providing sexual and reproductive health education to young  
49 people to equip them with information to safeguard their sexual health.

50 **Key words:** protective sexual behaviors, sexual fidelity, condom use, abstinence, sexual and  
51 reproductive health knowledge, reproductive empowerment

52

54 **Introduction**

55 While the literature is replete with studies on young people’s risky sexual behaviors and their  
56 effects on unintended pregnancy, unsafe abortion, and HIV and STIs acquisition, few studies have  
57 explored their practice of protective sexual behaviors [1-8]. Protective sexual behavior is viewed  
58 as behaviors that reduce the risk of contracting sexually transmitted infections (STIs) and  
59 unintended pregnancies—including abstinence, sexual fidelity, and consistent use of condoms [9,  
60 10]. Scholars tend to view young people’s sexual behaviors as dichotomous— as whether they use  
61 condoms or not—while neglecting the nuances inherent in their expression of their sexuality [10].  
62 Such dichotomous views often erroneously characterize young people not using condoms but  
63 practicing sexual fidelity and using other protective methods (such as injectable, emergency  
64 contraceptives, and pre-exposure prophylaxis) as engaging in risky sexual behavior [2, 10]. The  
65 lack of focus on protective sexual behaviors often limits our understanding of the full spectrum of  
66 young people’s sexual behaviors. In addition, our limited understanding of factors driving young  
67 people to embrace protective sexual behaviors hinders our ability to develop effective programs to  
68 safeguard their sexual health.

69 Scholars who have studied protective sexual behaviors have shown that religiosity, HIV  
70 instrumental stigma beliefs, living with both parents, and adequate family support are positively  
71 associated with protective sexual behaviors. Ajayi and Okeke (2019) showed that young people  
72 from two-parent families who receive adequate family financial support are more likely to embrace  
73 protective sexual behaviors than their counterparts [10]. Somefun (2019), looking at the  
74 relationship between religiosity and sexual abstinence, observed that highly religious young people  
75 often display resilience in the face of risk and therefore tend to embrace abstinence [11]. Cort and  
76 Tu (2018) analyzed multi-country data from sub-Saharan Africa (SSA) and found that

77 conservative HIV stigma attitudes are associated with lower risks of protective sexual behaviors  
78 [9]. However, there is limited evidence on the link between sexual and reproductive health  
79 knowledge and protective sexual behaviors. Although studies, mainly from the global north, have  
80 shown that teaching young people sexuality education, which encompasses building their  
81 reproductive health knowledge, is associated with improved sexual and reproductive health  
82 knowledge, attitudes, and behaviors [12-14]. Overall, there is limited evidence on how  
83 empowering young people with sexual and reproductive health knowledge could shape their sexual  
84 behaviors in SSA.

85 Reproductive empowerment through educating young people about sexual and reproductive health  
86 is transformative. It could expand individuals' capacity to make informed decisions about their  
87 reproductive lives, amplify their ability to participate meaningfully in public and private  
88 discussions related to sexuality, reproductive health, and fertility, and act on their preferences to  
89 achieve desired reproductive outcomes, free from violence, retribution, or fear [15]. Although  
90 there is no consensus on how to measure reproductive empowerment, studies have suggested that  
91 women's empowerment is associated with lower fertility, fertility desires, and higher contraceptive  
92 use among women [16-18]. These studies demonstrate the centrality of women's empowerment  
93 for reproductive outcomes.

94 In this study, we propose that sexual and reproductive health knowledge is an important factor  
95 associated with young people's practice of protective sexual behaviors, including sexual fidelity  
96 and condom use. Our assumption is premised on prior studies that have shown that teaching  
97 sexuality education is associated with positive sexual behaviors [12, 13]. SRHR knowledge is key  
98 to understanding different ways of safeguarding one's sexual health. For example, knowledge of  
99 the ovulatory cycle and fecundability is important to prevent unintended pregnancy, and the

100 knowledge of HIV transmission is key to preventing HIV [19, 20]. We examine our assumption  
101 using Nigeria's 2018 demographic and health survey data of non-partnered young women aged 15  
102 to 24 years. This age cohort has disproportionate exposure to adverse sexual and reproductive  
103 health outcomes, including new HIV infections and unintended pregnancies [21, 22]. Our study  
104 aligns with the global push for comprehensive sexuality education. Specifically, we compare the  
105 rate of protective sexual behavior among young people with a higher level of sexual and  
106 reproductive health knowledge to those with lower levels of knowledge. Our study contributes to  
107 the growing literature on factors influencing the practice of protective sexual behaviors among  
108 young people.

### 109 **Conceptual framework**

110 We drew from International Center for Research on Women's (ICRW) reproductive empowerment  
111 framework to understand through what mechanism sexual and reproductive health knowledge  
112 could impact protective sexual behaviors among young people [15]. The concept of empowerment  
113 is multidimensional, encompassing economic, social, cultural, legal, political, and psychological  
114 domains [23]. Pratley (2016) argues for the inclusion of a health-specific domain [24]. Similarly,  
115 the ICRW (2018) argues that reproduction is central to women's empowerment and should be  
116 considered as a separate domain of empowerment [17]. Empowerment in the reproductive sphere  
117 entails both the agency and resources to make decisions and take action to attain sexual and  
118 reproductive health. Resources are enabling factors that act as catalysts for empowerment.  
119 Resources are not only material but also human and social resources, including comprehensive  
120 knowledge of SRHR, which serve to enhance the ability to exercise agency and choice. For  
121 example, knowledge of contraceptives, fecundity, ovulation, and HIV prevention methods can be  
122 quite important for young people's sexual attitudes and behaviors.

123 For this reason, there is an emphasis on equipping young people with comprehensive sexuality  
124 education to enable them to make healthy relationship choices and express their agencies in  
125 reproductive decision-making [25, 26]. Several studies that aim to empower young people in the  
126 reproductive domains focus on designing curriculums to educate young people on reproductive  
127 health topics, including equitable gender norms, contraceptive methods and benefits, HIV/STI  
128 prevention methods, and healthy relationships, among others [27, 28]. Based on this conceptual  
129 framework, we argue that young people with reproductive health resources (comprehensive SRHR  
130 knowledge) would be more likely to express their agency and choice positively by embracing  
131 protective sexual behaviors. This leads us to hypothesize that young people's level of reproductive  
132 empowerment is positively associated with the adoption and practice of protective sexual  
133 behaviors.

## 134 **Methods**

### 135 *Data source*

136 We used the individual recode file of the 2018 Nigeria Demographic and Health Survey (NDHS)  
137 publicly available through <https://www.dhsprogram.com/data/available-datasets.cfm> . The NDHS  
138 is a nationally representative periodic cross-sectional survey that provides information on  
139 demographic and health indicators. NDHS employed a stratified, two-stage cluster sampling  
140 technique to select eligible respondents (women aged 15-49), allowing for accurate and reliable  
141 estimates of demographic and health indicators that are representative at the national, regional, and  
142 state residential levels.

### 143 *Study population*

144 This study considered only young women (aged 15-24) who were not partnered because this  
145 population is most at risk of contracting HIV and other STIs [21]. The NDHS interviewed 41,821  
146 women (aged 15-49), out of which 8,995 (weighted sample) young women (aged 15-24) were  
147 neither married nor living with a partner were considered in this study. Limiting the dataset to only  
148 young women who were not partnered is consistent with a previous study on the subject [9].

## 149 *Measures*

### 150 **Outcome variable**

151 The outcome variable in the study was protective sexual behavior. This variable is polytomous,  
152 with six different and mutually exclusive categories of sexual behaviors. Replicating the approach  
153 from a recent study on sub-Saharan Africa [9], information on young females related to (a) sexual  
154 experience, (a) sexual abstinence in the last 12 months, (c) condom use with the last and second-  
155 to last sexual partner, and (d) practice of sexual infidelity was combined to form the following six  
156 mutually exclusive categories of protective sexual behavior: (1) No sexual experience, (2)  
157 Abstinent over last 12 months, (3) Use condom and sexual fidelity, (4) Use condom and no sexual  
158 fidelity, (5) Sexual fidelity and no condom, and (6) No condom and no sexual fidelity.

### 159 **Explanatory variable**

160 The main explanatory variable of this study is sexual and reproductive health knowledge. We  
161 measured sexual and reproductive health knowledge as a variable using a composite score  
162 generated from dichotomous response options (yes (1) or no (0)) to questions about respondents'  
163 knowledge of (a) ovulatory cycle, (a) postpartum fecundability, and (c) contraceptives. These  
164 questions were drawn from MacQuarrie's (2021) multidimensional measure of youth  
165 empowerment, focusing on the reproductive health knowledge domain. Given that the questions



166 in the domain are not exhaustive, we included the HIV prevention questions to have a more  
167 comprehensive measure of sexual and reproductive health knowledge. HIV prevention questions  
168 sought to know whether participants knew that: (a) one could reduce HIV risk by using condoms  
169 at every sex event and limiting to one uninfected partner with no other partner, (b) a healthy-  
170 looking person can have HIV, (c) mosquito bites cannot transmit HIV, and (d) one cannot become  
171 infected by sharing food with a person who has HIV. These responses (yes (1) or no (0)) were  
172 added to generate a composite score. Finally, the respondents' composite scores on reproductive  
173 health knowledge and their comprehensive knowledge of HIV were summed to arrive at overall  
174 composite scores (ranging from 0 to 7) on reproductive health empowerment.

#### 175 **Covariates**

176 We included individual and community level covariates in the study. At the individual level, we  
177 considered wealth status, which was created as terciles (poor, middle, and rich) from the original  
178 wealth quintile developed by the DHS program. Other individual covariates were age (15-19 years  
179 and 20-24 years), marital status (never married and divorced/separated), religion (Christianity and  
180 Islam/others), and ethnicity (Hausa, Igbo, Yoruba, and others). We also considered HIV stigma  
181 beliefs, which Cort and Tu (2018) have shown to be associated with protective sexual behaviors  
182 [9]. This was a composite score computed from the summation of responses (yes (1) or no (1)) to  
183 questions that examined: (a) whether female youths would buy vegetables from a vendor with  
184 HIV, (b) whether female youths would be ashamed if someone in their family had HIV, and (c)  
185 whether children with HIV should be allowed to attend schools with children without HIV. The  
186 resulting scores (ranging from 0 to 3) were trichotomized as (0) no stigma, (1) moderate stigma  
187 belief (1 for those who scored from 1 to 2), and high stigma belief (those who scored 3).

188 Community-level factors play important roles in youths' sexual behaviors as such; we considered  
189 residence (urban and rural) and region of residence (Northcentral, North East, North West, South  
190 East, South-South, and South West) and the state-level HIV prevalence rates obtained from the  
191 2019 Nigeria National HIV/AIDS Indicator and Impact Survey Technical report [29]. We grouped  
192 states with high HIV prevalence rates (2-5.9% prevalence) to form the high HIV prevalence  
193 cluster. States with HIV prevalence ranging from 1.1-1.9% were grouped into moderate HIV  
194 prevalence clusters, and those with less than 1% prevalence rate were grouped as low HIV  
195 prevalence clusters.

## 196 *Statistical analyses*

197 All the variables were described using frequency, percentage distributions, and median.  
198 Multinomial logistic regression (MLR) was fitted at two stages to examine the relationship  
199 between the explanatory variable and protective sexual behavior. MLR was chosen for modeling  
200 protective sexual behavior because of its polytomous nature and nominal categories. In the first  
201 stage, the relationship between the explanatory variable and protective sexual behavior was  
202 separately examined using MLR: this produced unadjusted relative risk ratios. The final stage (the  
203 final model) contained all the covariates yielding adjusted relative risk ratios. The significance of  
204 the unadjusted relative risk ratios (uRRRs) and adjusted relative risk ratios (aRRRs) was tested  
205 against a 5% level of significance while their corresponding 95% confidence intervals were  
206 computed.

## 207 **Results**

### 208 *Descriptive results*

209 Table 1 presents the descriptive analysis of the variables in this study. The median year of  
 210 education was 11 years. The majority of the young single women were less than 20 years old  
 211 (72.51%) and never married (97.4%). More than half of the female youths were Christian (54.1%),  
 212 in the wealthiest quintile (54.1%), urban residents (56.2%), and had low stigma belief (52.4%).  
 213 Nearly one in five female youths (18.5%) resided in states with high HIV prevalence rates. The  
 214 median score on reproductive health empowerment was five. The majority of the young single  
 215 women (71.5%) had no sexual experience. About 7% of young women abstained from sex in the  
 216 past year, 7.2% used condoms and practiced sexual fidelity, 1.1% used condoms but did not  
 217 practice sexual fidelity, 12.7% did not use condoms but practiced sexual fidelity, and 0.8% of  
 218 neither used condoms nor practiced sexual fidelity.

219 **Table 1. Socio-demographic and behavioral characteristics of the respondents**

| Variables                              | Interval | %     | Median | IQR | No of cases |
|----------------------------------------|----------|-------|--------|-----|-------------|
| <b>Outcome variable</b>                |          |       |        |     |             |
| <b>Sexual Risk Behaviors</b>           |          |       |        |     |             |
| No sexual experience                   |          | 71.47 |        |     | 6,429       |
| Abstinent over last 12months           |          | 6.63  |        |     | 596         |
| Use condom & sexual fidelity           |          | 7.24  |        |     | 652         |
| Use condom & no sexual fidelity        |          | 1.07  |        |     | 96          |
| No condom & sexual fidelity            |          | 12.75 |        |     | 1,147       |
| No condom & no sexual fidelity         |          | 0.83  |        |     | 75          |
| <b>Explanatory variables</b>           |          |       |        |     |             |
| <b>Reproductive health empowerment</b> | 0-7      |       | 5      | 3   |             |
| <b>Age</b>                             |          |       |        |     |             |
| 15-19                                  |          | 72.51 |        |     | 6,522       |
| 20-24                                  |          | 27.49 |        |     | 2,473       |
| <b>Marital status</b>                  |          |       |        |     |             |

|                           |       |       |    |   |       |
|---------------------------|-------|-------|----|---|-------|
| Never married             |       | 97.42 |    |   | 8,763 |
| Divorced/separated        |       | 2.58  |    |   | 232   |
| <b>Years of education</b> | 0-20  |       | 11 | 4 |       |
| <b>Wealth index</b>       |       |       |    |   |       |
| Poor                      | 25.63 |       |    |   | 2,305 |
| Middle                    | 20.25 |       |    |   | 1,821 |
| Rich                      | 54.13 |       |    |   | 4,869 |
| <b>Religion</b>           |       |       |    |   |       |
| Christianity              |       | 54.13 |    |   | 4,869 |
| Islam / others            |       | 45.87 |    |   | 4,126 |
| <b>Ethnicity</b>          |       |       |    |   |       |
| Hausa/Fulani              |       | 26.12 |    |   | 2,350 |
| Igbo                      |       | 18.07 |    |   | 1,626 |
| Yoruba                    |       | 18.24 |    |   | 1,641 |
| Others                    |       | 37.56 |    |   | 3,378 |
| <b>Residence</b>          |       |       |    |   |       |
| Urban                     |       | 56.20 |    |   | 5,055 |
| Rural                     |       | 43.80 |    |   | 3,940 |
| <b>Region</b>             |       |       |    |   |       |
| North Central             |       | 14.98 |    |   | 1,347 |
| North East                |       | 15.23 |    |   | 1,370 |
| North West                |       | 22.31 |    |   | 2,007 |
| South East                |       | 14.12 |    |   | 1,270 |
| South South               |       | 13.78 |    |   | 1,240 |
| South West                |       | 19.57 |    |   | 1,760 |
| <b>HIV belief stigma</b>  |       |       |    |   |       |
| No stigma                 |       | 16.50 |    |   | 1,380 |
| Low stigma                |       | 52.38 |    |   | 4,381 |
| High stigma               |       | 31.12 |    |   | 2,603 |

| State-level HIV prevalence |  |       |  |  |       |
|----------------------------|--|-------|--|--|-------|
| Low                        |  | 43.02 |  |  | 3,870 |
| Moderate                   |  | 38.48 |  |  | 3,461 |
| High                       |  | 18.50 |  |  | 1,664 |

220 IQR = Interquartile range

221

222 **Relationship between reproductive health empowerment and protective sexual behaviors**

223 Table 2 presents the results from unadjusted (Model 1) and adjusted (Model 2) multinomial logistic  
224 regression models. In the first model, sexual and reproductive health knowledge was associated  
225 with protective sexual behavior. Specifically, an increase in sexual and reproductive health  
226 knowledge was associated with a 17% reduction in the probability of having no sexual experience  
227 (uRRR = 0.83; CI = 0.73-0.96) relative to not using condoms and not practicing sexual fidelity.  
228 However, after including covariates in Model 2, the strength of the relationship reduced, and the  
229 effect size was no longer significant. In contrast, the higher the sexual and reproductive health  
230 knowledge, the higher the probability of using condoms and practicing sexual fidelity (uRRR =  
231 1.28; CI = 1.04-1.60) relative to not using condoms and not practicing sexual infidelity. The  
232 direction and strength of this relationship remained even with the inclusion of covariates in Model  
233 2, thus providing evidence in support of our hypothesis that sexual and reproductive health  
234 knowledge is associated with protective sexual behavior. In Model 1, sexual and reproductive  
235 health knowledge was associated with a higher probability of using condoms and not practicing  
236 sexual fidelity (aRRR = 1.30; CI = 1.04-1.61) relative to not using condoms and not practicing  
237 sexual fidelity. However, in Model 2, the direction of the relationship remained while its strength  
238 reduced and was no longer significant. There was no significant relationship between sexual and

239 reproductive health knowledge and abstinence in the last 12 months in both models, likewise not  
 240 using condoms and practicing sexual fidelity.

241 **Table 2: Multivariable multinomial logistic regression of protective sexual behavior on**  
 242 **reproductive health empowerment**

| Protective sexual behaviors     | Model 1 <sup>a</sup><br>uRRR (CI) | Model 2 <sup>b</sup><br>aRRR (CI) |
|---------------------------------|-----------------------------------|-----------------------------------|
| No sexual experience            | 0.83(0.73,0.96)*                  | 0.96(0.79,1.16)                   |
| Abstinent over last 12 months   | 1.00(0.87,1.15)                   | 1.03(0.85,1.26)                   |
| Use condom & sexual fidelity    | 1.28(1.10,1.50)***                | 1.29(1.04,1.60)*                  |
| Use condom & no sexual fidelity | 1.30(1.04,1.61)*                  | 1.25(0.95,1.66)                   |
| No condom & sexual fidelity     | 1.05(0.91,1.21)                   | 1.10(0.91,1.34)                   |

243 Base outcome =“no condom & no sexual fidelity”; \*\*\*P-value  $\leq 0.001$ ; \*P < 0.05; CI: Confidence Interval; RC =  
 244 Reference Category; <sup>a</sup>No covariate present; <sup>b</sup>covariates present: age, marital status, education level, wealth status,  
 245 religion, ethnicity, residence, region, HIV stigma beliefs, and state-level HIV prevalence; uRRR: unadjusted relative  
 246 risk ratio; aRRR: adjusted relative risk ratio

247

## 248 Discussion

249 Our study examined the patterns of protective sexual among young women (aged 15 to 24) and  
 250 the role of sexual and reproductive health knowledge. We found that most young women in the  
 251 study setting engaged in protective sexual behaviors, including abstinence, sexual fidelity, and  
 252 condom use. However, nearly one in 100 young women did not use condoms and did not practice  
 253 sexual fidelity. While this rate may appear negligible, it is, in fact, a substantial number of young  
 254 people in Nigeria practicing no condoms and no sexual fidelity, considering the high young women  
 255 population in Nigeria [30]. Overall, our findings suggest that the practice of protective sexual  
 256 behavior is high among young women in Nigeria, which is consistent with past studies [10, 11].

257 In support of our hypothesis, we found a significant positive association between sexual and  
258 reproductive health knowledge and condom use and sexual fidelity. However, the effect size of  
259 the association between sexual and reproductive health knowledge and condom use but no sexual  
260 fidelity no longer reached a significant threshold after controlling for important covariates, even  
261 though the direction of the effect remains. Overall, our study presents robust evidence of the  
262 importance of empowering young people with sexual and reproductive health information. When  
263 young people are empowered with information on sexual and reproductive health, they are more  
264 likely to embrace protective sexual behaviors and make healthy choices about their reproductive  
265 health [25, 31]. Even though there is limited evidence on the association between sexual and  
266 reproductive knowledge and protective sexual behavior, our finding is consistent with previous  
267 studies reporting a positive association between measures of empowerment or agency and  
268 contraceptive use [32-34]. Our finding is consistent with studies that have reported the association  
269 between sexuality education and young people's sexual behavior [14, 35]. While young people  
270 receive limited sexuality education in Nigerian schools, information on sexuality is available  
271 online and through the media. Many young women learn about sexual and reproductive health,  
272 including contraceptive methods, especially after becoming sexually active [36, 37]. However,  
273 those who lack access to sexual and reproductive health information or those exposed to wrong  
274 information are at risk of not adequately protecting themselves against unintended pregnancies  
275 and STIs. Our study underscores the need for targeted sexuality education interventions for young  
276 women to safeguard their sexual health.

### 277 **Implications of the study**

278 Our study findings can inform programs and interventions targeting young people with sexual and  
279 reproductive health information. Educating young people about fecundability, contraceptive use,

280 HIV prevention methods, and other sexual and reproductive health topics is critical. Investing in  
281 young people's sexual and reproductive health skills and resources is crucial for increasing their  
282 reproductive health empowerment (agency). Such investment will yield benefits by increasing  
283 their ability to practice protective sexual behaviors that could help them make healthy life choices,  
284 including sexual fidelity and contraceptive use, and prevent HIV, STIs, and unintended  
285 pregnancies.

### 286 **Study strengths and limitations**

287 This study has made important contributions to the literature on protective sexual behaviors. The  
288 data used is nationally representative, allowing for robust analysis and generalization. However, it  
289 is important to highlight a few limitations of the study. Due to the limitation of secondary data  
290 used in this study, our sexual and reproductive health knowledge measure is neither exhaustive  
291 nor comprehensive. The study's cross-sectional nature means we could not draw a causal link  
292 between sexual and reproductive health knowledge and protective sexual behaviors. Also, self-  
293 reporting of sensitive issues such as sex, sexual fidelity, and contraceptive use is fraught with  
294 social desirability bias, suggesting our study could have overestimated protective sexual behaviors  
295 prevalence.

296 Nonetheless, our study makes important contributions to the emerging literature on the topic in  
297 Nigeria. It is one of the first studies to focus on sexual and reproductive health knowledge and  
298 protective sexual behaviors. Future studies should build on our study by developing a  
299 multidimensional measure for sexual and reproductive health knowledge and examine how it  
300 influences protective sexual behaviors.

### 301 **Conclusion**



302 We found a high prevalence of protective sexual behavior among young women in Nigeria. Our  
303 study provides evidence on the association between sexual and reproductive health knowledge and  
304 the likelihood of practicing protective sexual behaviors. Based on our findings, we conclude that  
305 a higher level of sexual and reproductive health knowledge can increase the likelihood of adopting  
306 sexual protective sexual practices such as sexual fidelity and the use of condoms. Intervention  
307 efforts can focus on providing sexual and reproductive health education to young people to equip  
308 them with information to safeguard their sexual health.

### 309 **Acknowledgement**

310 We thank measure DHS for making the data analyzed in this study publicly available and David  
311 Cort for supporting our data analysis.

### 312 **Funding**

313 AIA's time to develop this paper was supported with funding from the African Regional Office of  
314 the Swedish International Development Cooperation Agency, Sida Contribution Grant 12103. The  
315 funder has no role in conceptualizing, drafting and reviewing of this paper.

### 316 **Ethical consideration**

317 The Nigeria Ministry of Health's ethics committee granted ethics approval for the 2018 NDHS.  
318 Since we analyzed de-identified dataset that is publicly available, we do not require another ethics  
319 authorization.

### 320 **Conflict of interests**

321 None declared

### 322 **Authors' contributions**

323 DAO, OAA and AIA conceptualized this study. DAO conducted the analysis with inputs from  
324 AIA. All authors contributed to drafting and reviewing the manuscript.

### 325 **Data sharing**

326 Data analyzed in this study is available via [https://www.dhsprogram.com/data/available-](https://www.dhsprogram.com/data/available-datasets.cfm)  
327 [datasets.cfm](https://www.dhsprogram.com/data/available-datasets.cfm)

328

### 329 **References**

- 330 1. Adeboye A, Yongsong Q, James N. Risky Sexual Behavior and Knowledge of HIV/AIDS  
331 among High School Students in Eastern Cape South Africa. *J Hum Ecol.* 2016;53(3):194-  
332 204.
- 333 2. Ali M, Ajilore O. Risky sexual behavior and African-American youth: What is the role of  
334 family structure? *J Health Behav & Pub Health* 2011;1(1):30-40
- 335 3. Imaledo JA, Peter-Kio OB, Asuquo EO. Pattern of risky sexual behavior and associated  
336 factors among undergraduate students of the University of Port Harcourt, Rivers State,  
337 Nigeria. *Pan Afr Med J.* 2012;12(1).
- 338 4. Kebede A, Molla B, Gerense H. Assessment of risky sexual behavior and practice among  
339 Aksum University students, Shire Campus, Shire Town, Tigray, Ethiopia, 2017. *BMC Res*  
340 *Notes.* 2018;11(1):88.
- 341 5. Oluwatoyin F, Oyetunde M. Risky sexual behavior among secondary school adolescents in  
342 Ibadan North Local Government Area, Nigeria. *JNHS.* 2014;3:34-44.

- 343 6. Othieno CJ, Okoth R, Peltzer K, Pengpid S, Malla LO. Risky HIV sexual behaviour and  
344 depression among University of Nairobi students. *Ann Gen Psychiatry*. 2015;14(1):16.
- 345 7. Ritchwood TD, Ford H, DeCoster J, Sutton M, Lochman JE. Risky sexual behavior and  
346 substance use among adolescents: A meta-analysis. *Child Youth Serv Rev*. 2015;52:74-88.
- 347 8. Tsutsumi A, Izutsu T, Matsumoto T. Risky sexual behaviors, mental health, and history of  
348 childhood abuse among adolescents. *Asian J Psychiatr*. 2012;5(1):48-52.
- 349 9. Cort DA, Tu HFJSS, Medicine. Safety in stigmatizing? Instrumental stigma beliefs and  
350 protective sexual behavior in Sub-Saharan Africa. *Soc Sci Med*. 2018;197:144-52.
- 351 10. Ajayi AI, Okeke SR. Protective sexual behaviours among young adults in Nigeria: influence  
352 of family support and living with both parents. *BMC Public Health*. 2019;19(1):983. doi:  
353 10.1186/s12889-019-7310-3.
- 354 11. Somefun OD. Religiosity and sexual abstinence among Nigerian youths: does parent religion  
355 matter? *BMC Public Health*. 2019;19(1):416.
- 356 12. Kirby DB. The impact of abstinence and comprehensive sex and STD/HIV education  
357 programs on adolescent sexual behavior. *Sex Res Social Policy*. 2008;5(3):18-27.
- 358 13. Fonner VA, Armstrong KS, Kennedy CE, O'Reilly KR, Sweat MD. School based sex  
359 education and HIV prevention in low-and middle-income countries: a systematic review and  
360 meta-analysis. *PLOS ONE*. 2014;9(3):e89692.
- 361 14. Cheedalla A, Moreau C, Burke AE. Sex education and contraceptive use of adolescent and  
362 young adult females in the United States: an analysis of the National Survey of Family  
363 Growth 2011–2017. *Contraception: X*. 2020;2:100048.

- 364 15. Edmeades J, Hinson L, Sebany M, Murithi L. A conceptual framework for reproductive  
365 empowerment: Empowering individuals and couples to improve their health (Brief).  
366 Washington, DC: International Center for Research on Women. 2018.
- 367 16. James-Hawkins L, Peters C, VanderEnde K, Bardin L, Yount KM. Women's agency and its  
368 relationship to current contraceptive use in lower-and middle-income countries: A systematic  
369 review of the literature. *Glob Public Health*. 2018;13(7):843-58.
- 370 17. Upadhyay UD, Dworkin SL, Weitz TA, Foster DG. Development and validation of a  
371 reproductive autonomy scale. *Stud Fam Plann*. 2014;45(1):19-41.
- 372 18. Upadhyay UD, Gipson JD, Withers M, Lewis S, Ciaraldi EJ, Fraser A, et al. Women's  
373 empowerment and fertility: a review of the literature. *Soc Sci Med*. 2014;115:111-20.
- 374 19. Long L, Yuan T, Wang M, Xu C, Yin J, Xiong C, et al. Factors associated with condom use  
375 among male college students in Wuhan, China. *PLOS ONE*. 2012;7(12):e51782.
- 376 20. Frost JJ, Lindberg LD, Finer LB. Young adults contraceptive knowledge, norms and  
377 attitudes: associations with risk of unintended pregnancy. *Perspect Sex Reprod Health*.  
378 2012;44(2):107-16.
- 379 21. Organization WH. Global health sector strategy on HIV 2016-2021. Towards ending AIDS.  
380 World Health Organization, 2016.
- 381 22. Adeniyi OV, Ajayi AI, Moyaki MG, Ter Goon D, Avramovic G, Lambert J. High rate of  
382 unplanned pregnancy in the context of integrated family planning and HIV care services in  
383 South Africa. *BMC Health Serv Res*. 2018;18(1):140.
- 384 23. Malhotra A, Schuler SR. Women's empowerment as a variable in international development.  
385 *Measuring empowerment: Cross-disciplinary perspectives*. 2005;1(1):71-88.

- 386 24. Pratley P. Associations between quantitative measures of women’s empowerment and access  
387 to care and health status for mothers and their children: a systematic review of evidence from  
388 the developing world. *Soc Sci Med.* 2016;169:119-31.
- 389 25. Haberland N, Rogow D. Sexuality education: emerging trends in evidence and practice. *J*  
390 *Adolesc Health.* 2015;56(1):S15-S21.
- 391 26. Goldman JD. A critical analysis of UNESCO’s International Technical Guidance on school-  
392 based education for puberty and sexuality. *Sex Educ.* 2012;12(2):199-218.
- 393 27. Austrian K, Soler-Hampejsek E, Kangwana B, Maddox N, Wado YD, Abuya B, et al.  
394 *Adolescent Girls Initiative–Kenya: Endline evaluation report.* 2020.
- 395 28. Austrian K, Soler-Hampejsek E, Kangwana B, Wado Y, Abuya B, Maluccio J. Impacts of  
396 two-year multi-sectoral interventions on young adolescent girls’ education, health and  
397 economic outcomes: *Adolescent Girls Initiative-Kenya randomized trial.* 2020.
- 398 29. Federal Ministry of Health N. Nigeria HIV/AIDS Indicator and Impact Survey report  
399 (NAIIS) 2018: Technical Report Abuja, Nigeria: Federal Ministry of Health, Nigeria., 2019.
- 400 30. United Nations, Department of Economic and Social Affairs, Population Division. 2019  
401 *Revision of World Population Prospects.* New York: United Nations, 2019 0897149726.
- 402 31. UNESCO. *The Journey towards Comprehensive Sexuality Education.* Paris, France:  
403 UNESCO, 2021.
- 404 32. Do M, Kurimoto N. Women’s empowerment and choice of contraceptive methods in selected  
405 African countries. *Int Perspect Sex Reprod Health.* 2012:23-33.

- 406 33. Vizheh M, Muhidin S, Behboodi Moghadam Z, Zareiyan A. Women empowerment in  
407 reproductive health: a systematic review of measurement properties. *BMC Womens Health*.  
408 2021;21(1):1-13.
- 409 34. Viswan SP, Ravindran TS, Kandala N-B, Petzold MG, Fonn S. Sexual autonomy and  
410 contraceptive use among women in Nigeria: findings from the demographic and health  
411 survey data. *Int J Womens Health*. 2017;9:581.
- 412 35. Boti N, Hussen S, Shegaze M, Shibru S, Shibiru T, Zerihun E, et al. Effects of  
413 comprehensive sexuality education on the comprehensive knowledge and attitude to condom  
414 use among first-year students in Arba Minch University: a quasi-experimental study. *BMC*  
415 *Res Notes*. 2019;12(1):1-7.
- 416 36. Ajayi AI, Nwokocha EE, Adeniyi OV, Ter Goon D, Akpan W. Unplanned pregnancy-risks  
417 and use of emergency contraception: a survey of two Nigerian Universities. *BMC Health*  
418 *Serv Res*. 2017;17(1):382. doi: 10.1186/s12913-017-2328-7.
- 419 37. Ajayi AI, Olamijuwon EO. What predicts self-efficacy? Understanding the role of  
420 sociodemographic, behavioural and parental factors on condom use self-efficacy among  
421 university students in Nigeria. *PLOS ONE*. 2019;14(8):e0221804.
